# Supplementary material
Source: publisher figshare collection journal article supplement (https://tandf.figshare.com/articles/dataset/_/26340559)
Supplement: Supplementary file 1 [file 1]

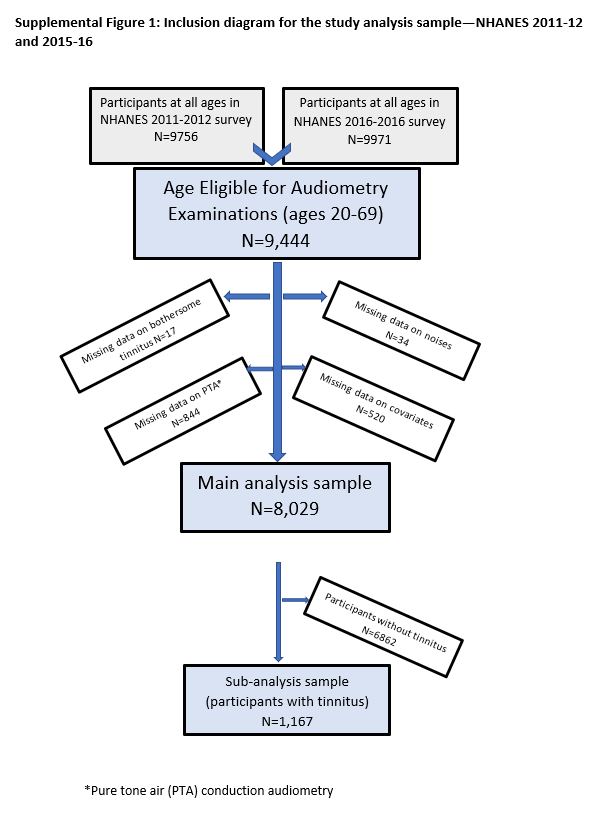


Supplemental Figure 1. Inclusion diagram for study analysis.


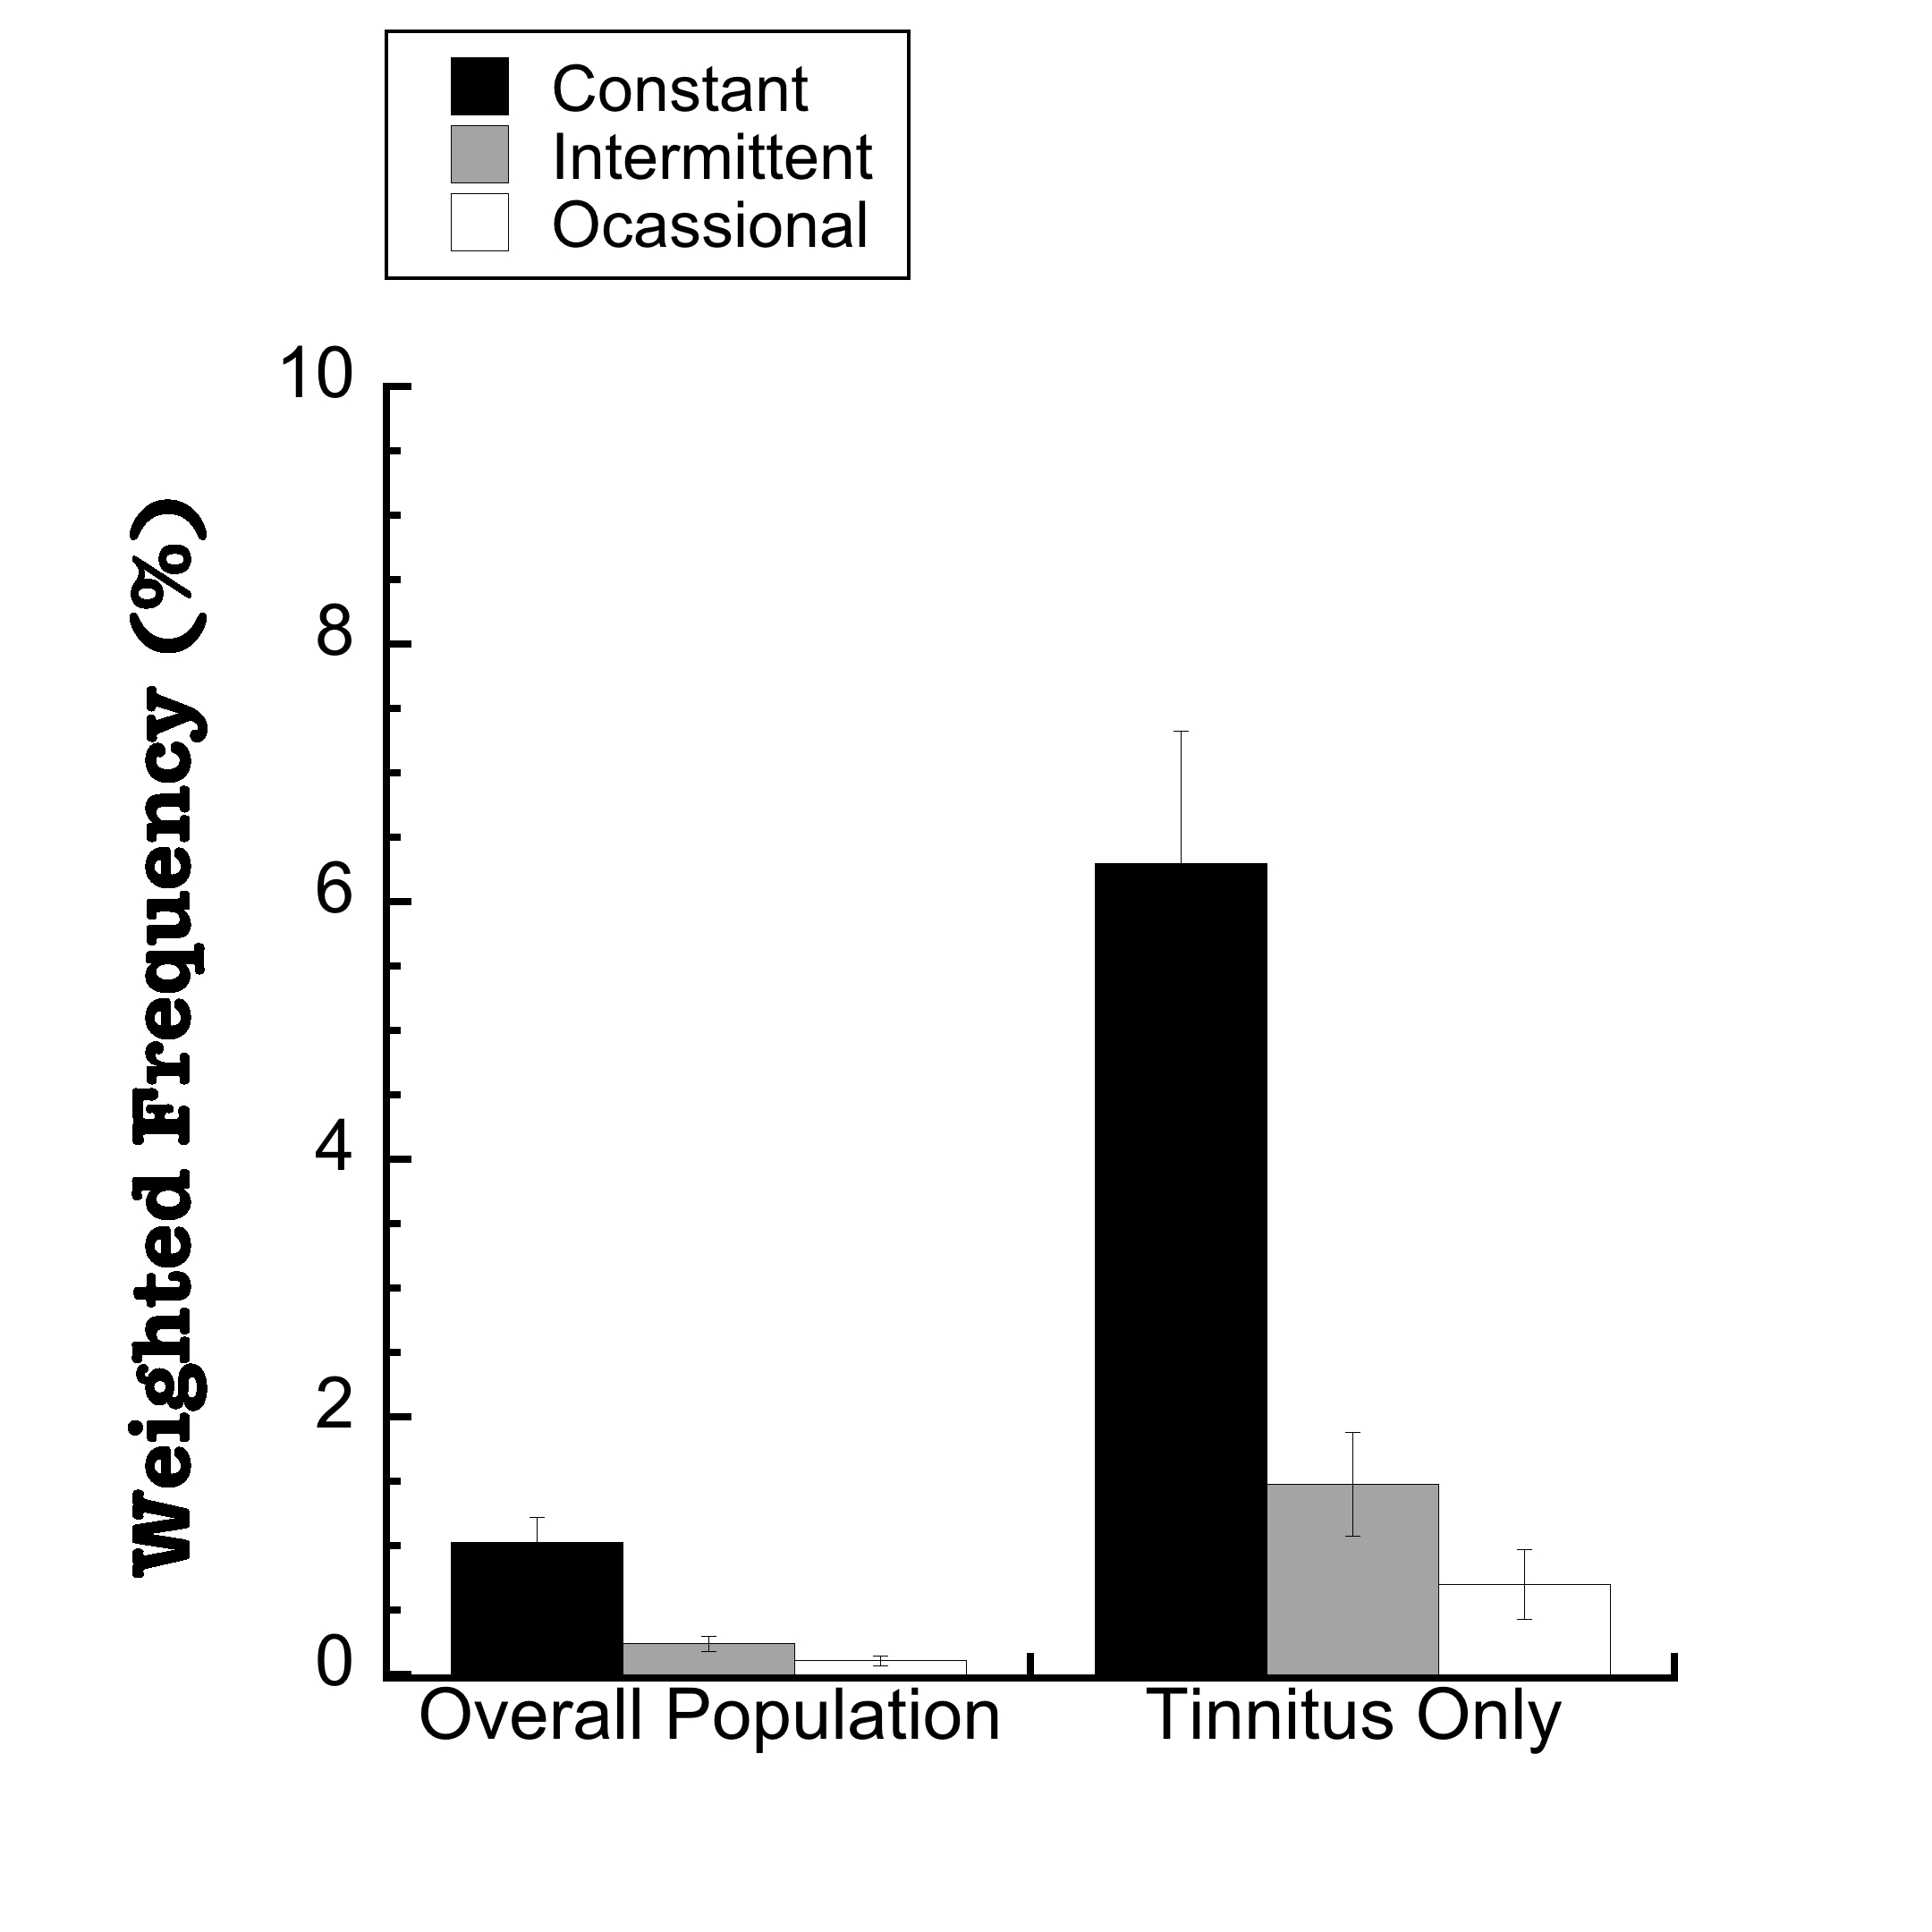


Supplemental Figure 2. Prevalence of Big + Problematic tinnitus by frequency. Big problem + tinnitus was related to tinnitus frequency; shown for overall population and tinnitus only.
